# Supplementary material for: Health system and oral health impacts of economic sanctions and blockades: a PRISMA-ScR–guided scoping review with lessons for Yemen
Source: Research Square preprint supplement (doi:10.21203/rs.3.rs-8789468/v1), 2026-02-05
Supplement: Supplementary file 1 [file 26640a1fe19c2710da38c63b.docx]

Table S1. Full-text reports excluded with reasons

| Citation | Reason for exclusion | Notes |
| --- | --- | --- |
| Qureshi WA. The crisis in Yemen: Armed conflict and international law. NCJ Int Law. 2019;45:227. | Non‑empirical legal analysis; no health‑system or oral‑health outcomes (wrong design). | Legal context/background only. |
| Ismail AI, Sohn W. The impact of universal access to dental care on inequalities in oral health: a review. J Dent Res. 2001;80(1):143–150. | Not related to sanctions/embargo/blockade (wrong exposure). | General oral‑health equity review. |
| Sadeghi H, Moghaddam S, et al. Psychosocial consequences of crises: a systematic review. BMC Public Health. 2024;24:19750. | Crisis‑focused synthesis without sanctions/embargo exposure (wrong exposure). | Does not evaluate blockade/sanction effects. |
| Impact of War on Oral Health: A Systematic Review. Conflict and Oral Health Journal. 2024. | War/armed conflict focus; no sanctions/embargo exposure (wrong exposure). | Outside predefined exposure criteria. |
| Colombia’s Armed Conflict and Dental Caries among Adults. Community & Regional Epidemiology. 2024. | Armed‑conflict epidemiology without sanctions/embargo context (wrong exposure). | Country not under economic blockade in scope; no linkage to sanctions. |
