# Supplementary material for: Health system and oral health impacts of economic sanctions and blockades: a PRISMA-ScR–guided scoping review with lessons for Yemen
Source: Research Square preprint supplement (doi:10.21203/rs.3.rs-8789468/v1), 2026-02-05
Supplement: Supplementary file 2 [file ad6078565094438dba0b9975.docx]

# Additional file 2. Critical appraisal summary (pragmatic)

Note: Critical appraisal is not used to exclude sources in this scoping review; it is provided to support interpretation. Peer-reviewed observational studies were appraised with AXIS (where applicable) and grey literature reports with AACODS.

| Source | Type | Tool | Overall appraisal | Key strengths | Key limitations / bias concerns | Use in synthesis |
| --- | --- | --- | --- | --- | --- | --- |
| Spiegel & Yassi (2004) | Peer-reviewed | Narrative/AXIS (policy analysis) | Moderate–High | Clear policy context; coherent argumentation; multiple indicators referenced | Limited causal identification; some outcomes indirect | Used for resilience mechanisms in Cuba |
| Drain & Barry (2010) | Peer-reviewed (commentary/review) | Narrative appraisal (transparency, referencing) | Moderate | Synthesizes embargo implications with outcome data | Not a systematic review; selection may be non-exhaustive | Contextualizes health-outcome paradox under embargo |
| Ali & Shah (2000) | Peer-reviewed | AXIS (survey analysis) | Moderate | Empirical analysis of mortality patterns; clear exposure period | Confounding by war and data quality debates | Used for Iraq mortality/system deterioration signals |
| Daponte & Garfield (2000) | Peer-reviewed | AXIS (demographic analysis) | Moderate | Transparent methods; sensitivity to data sources | Residual uncertainty in estimates; confounding | Used to triangulate Iraq mortality impacts |
| Gibbons & Garfield (1999) | Peer-reviewed | AXIS | Moderate | Links embargo period to measurable outcomes; clear timeframe | Observational design; attribution challenges | Used for Haiti service and mortality impacts |
| Coovadia et al. (2009) | Peer-reviewed | Narrative appraisal (policy/historical) | Moderate | High-quality synthesis; credible data sources | Not sanctions-specific; complex political economy | Used for governance/inequity lessons |
| Qirbi & Ismail (2017) | Peer-reviewed | Narrative/AXIS (case study) | Moderate–High | System framework; clear pre/post conflict comparisons | Conflict co-exposures; limited sanctions attribution | Used for Yemen health system pathways |
| Safi et al. (2020) | Peer-reviewed | AXIS | High | Robust geospatial methods; clear outputs | Access proxy limitations | Used for Yemen access/service availability mapping |
| World Bank (2021) | Grey literature (institutional report) | AACODS | High | Authoritative source; clear policy framing; documented methods | Not primarily designed as sanctions study | Used for Yemen financing/system constraints |
| OMCT (2022) | Grey literature (advocacy report) | AACODS | Moderate | Detailed documentation; triangulates humanitarian sources | Advocacy framing; limited primary empirical data | Used for blockade mechanisms affecting goods/humanitarian access |
